# Supplementary material for: A novel approach to improving colonoscopy learning efficiency through a colonoscope roaming system: randomized controlled trial
Source: PeerJ Comput Sci. 2023 Jun 9;9:e1409. doi: 10.7717/peerj-cs.1409 (PMC10280502; doi:10.7717/peerj-cs.1409)
Supplement: Supplemental Information 5 [file peerj-cs-09-1409-s005.xlsx]

## Sheet: Sheet1
No.	E-learning group pretest scores	Control group pretest scores	E-learning group posttest scores	Control group posttest scores	E-learning group Colonoscopy training score	Control group Colonoscopy training score	E-learning group Sigmoid colon	E-learning group Splenic flexure	E-learning group Hepatic flexure	E-learning group Cecum	Control group Sigmoid colon	Control group Splenic flexure	Control group Hepatic flexure	Control group Cecum	The time to reach the sigmoid colon in the EG(min)	The time to reach splenic flexure in the EG(min)	The time to reach hepatic flexure in the EG(min)	The time to reach cecum in the EG(min)	The time to reach the sigmoid colon in the CG(min)	The time to reach splenic flexure in the CG(min)	The time to reach hepatic flexure in the CG(min)	The time to reach cecum in the CG(min)	Detection rate of polyps in the EG	Detection rate of polyps in the CG
1	50	50	80	70	90	88	15	13	13	8	14	12	11	6	12	17	21	25	17	21	25	30	3	0
2	48	36	84	84	94	90	16	14	13	9	15	13	11	6	11	16	20	24	16	20	24	28	1	2
3	48	48	84	78	91	90	15	14	13	7	12	11	11	4	12	17	21	25	15	19	23	27	0	1
4	50	50	82	68	84	94	16	15	14	8	13	13	13	6	13	18	22	28	16	20	25	29	2	0
5	48	38	78	84	93	86	15	14	13	7	15	13	11	4	9	13	17	20	15	19	22	25	2	1
6	52	54	86	82	91	90	18	15	15	8	14	12	11	4	12	20	25	30	13	18	22	26	0	0
7	46	42	82	80	89	88	12	12	11	6	14	12	11	4	11	19	24	30	16	20	24	30	1	0
8	48	50	84	88	93	90	17	16	15	8	15	14	13	5	8	13	17	21	14	18	22	26	2	2
9	50	62	90	80	92	90	18	17	16	8	14	13	12	5	13	17	20	26	14	20	24	29	2	2
10	42	46	86	78	95	86	15	13	13	7	17	15	14	6	10	15	18	22	11	17	21	25	1	3
11	52	50	80	74	91	86	18	17	16	8	15	13	12	5	11	15	19	22	13	21	25	28	1	0
12	46	46	88	78	89	92	16	15	14	9	14	12	12	6	11	16	20	25	15	19	24	30	2	1
13	50	42	82	88	87	84	12	11	11	6	11	10	10	6	9	13	19	23	12	18	23	30	1	1
14	50	50	88	74	93	82	15	14	13	7	16	15	14	7	9	13	16	20	12	17	21	25	2	2
15	48	50	82	76	88	94	14	13	12	7	17	15	13	5	10	14	18	22	13	18	22	28	3	1
16	50	52	80	68	91	84	14	13	13	6	12	11	11	6	8	12	17	23	12	17	23	28	2	0
17	46	60	86	80	93	80	13	12	12	6	15	12	12	5	11	15	20	25	13	20	25	28	2	0
18	48	48	88	88	89	92	17	15	14	7	16	14	12	6	10	14	19	23	10	15	19	22	3	0
19	50	50	84	78	87	90	18	15	14	6	17	16	15	6	10	14	18	22	11	14	20	24	1	2
20	48	46	80	80	90	89	16	13	12	5	11	10	10	5	10	15	20	25	15	19	23	30	0	0
21	48	42	80	62	88	87	18	16	13	6	12	11	11	5	12	17	21	25	12	18	22	29	2	1
22	44	58	82	86	93	90	14	13	12	10	16	15	13	6	9	13	17	22	13	17	21	26	1	0
23	50	50	78	84	93	84	15	14	13	7	16	14	12	6	9	13	17	20	15	19	22	25	3	2
24	48	38	86	82	91	90	17	14	14	7	14	12	11	5	12	20	25	30	13	18	22	26	1	0
25	48	54	80	80	89	88	11	11	10	6	14	12	11	5	11	19	24	30	16	20	24	30	1	1
26	50	42	84	88	93	90	16	15	14	9	16	15	14	7	8	13	17	21	14	18	22	26	3	2
27	48	50	90	80	92	90	17	16	15	8	14	13	12	5	13	17	20	26	14	20	24	29	2	2
28	52	62	86	78	95	84	14	12	12	6	17	15	14	6	10	15	18	22	11	17	21	25	1	0
29	46	46	80	74	91	86	16	15	14	6	15	13	12	6	13	17	21	24	13	21	25	28	2	0
30	48	50	86	78	89	92	16	15	14	7	13	11	11	5	11	16	20	25	15	19	24	30	2	1
31	50	46	82	88	87	84	12	11	11	5	11	10	10	6	9	13	19	23	12	18	23	30	2	1
32	52	42	88	74	93	82	15	14	13	8	14	13	12	4	9	13	16	20	12	17	21	25	3	2
33	52	50	82	76	88	94	13	12	11	5	17	15	13	4	10	14	18	22	13	18	22	28	2	2
34	46	50	80	68	91	84	14	13	13	8	12	11	11	6	8	12	17	23	12	17	23	28	3	1
35	50	52	86	80	93	80	13	12	12	5	15	12	12	6	11	15	20	25	13	20	25	28	1	0
36	50	60	88	88	89	92	17	15	14	6	16	14	12	6	10	14	19	23	10	15	19	22	2	1
37	48	48	84	78	87	90	18	15	14	6	17	16	15	6	8	12	16	20	11	14	20	24	2	2
38	50	50	80	80	90	89	19	16	15	6	13	12	12	6	10	15	20	25	15	19	23	30	0	1
39	46	46	80	62	88	87	18	16	13	6	12	11	11	5	12	17	21	25	12	18	22	29	1	1
40	48	42	82	86	93	90	14	13	12	5	16	15	13	7	9	13	17	22	13	17	21	26	1	0
		46		80		94					10	10	10	10					13	18	22	25		0
253	1944	1994	3338	3228	3623	3612	617	559	526	275	587	526	491	229	414	604	774	954	545	748	925	1117	66	38

## Sheet: Sheet2
No.	Age in the EG(years)	Age in the EG(years)
1	25	26
2	24	25
3	25	25
4	25	25
5	25	26
6	25	25
7	25	25
8	25	25
9	28	26
10	25	25
11	25	25
12	25	26
13	25	25
14	27	25
15	25	27
16	26	25
17	25	25
18	26	25
19	25	27
20	26	25
21	25	26
22	26	25
23	25	26
24	24	25
25	25	25
26	25	25
27	25	26
28	25	25
29	25	25
30	25	25
31	28	26
32	25	25
33	25	25
34	25	26
35	25	25
36	27	25
37	25	27
38	26	25
39	25	25
40	26	25
		26
