# Supplementary material for: A novel approach to improving colonoscopy learning efficiency through a colonoscope roaming system: randomized controlled trial
Source: PeerJ Comput Sci. 2023 Jun 9;9:e1409. doi: 10.7717/peerj-cs.1409 (PMC10280502; doi:10.7717/peerj-cs.1409)
Supplement: Supplemental Information 6 [file peerj-cs-09-1409-s006.xlsx]

## Sheet: Sheet1
	Strongly disagree	Disagree	Neutral	Agree	Strongly agree
Q5:The CRS provides up-to-date content.	1	0	1	2	36
Q4:The CRS provides content that exactly fits your needs.	2	1	1	3	33
Q3:The CRS provides useful content.	0	1	1	1	37
Q2:The CRS provides sufficient content.	2	2	1	0	35
Q1:The CRS provides accurate and comprehensive clinical content	1	2	1	3	33
Q5:The CRS is easy to use and understand.	1	1	1	1	36
Q4:The CRS responds to your requests fast enough.	1	0	1	1	37
Q3:The operation of the CRS is stable.	1	0	2	1	36
Q2:The CRS is user-friendly.	8	4	1	3	24
Q1:The CRS makes it easy for you to find the content you need.	1	3	2	1	33
Q5:The testing methods provided by the CRS are easy to understand.	1	2	2	3	32
Q4:The CRS provides secure testing environments.	1	1	2	1	35
Q3:The CRS makes it easy for you to evaluate your learning performance.	1	0	2	2	35
Q2:The CRS provides testing results promptly.	0	1	1	1	37
Q1:The testing methods provided by the CRS are fair.	1	3	0	2	34
Q5:The CRS enables you to control your learning progress.	1	0	1	1	37
Q4:The CRS enables you to learn the content you need.	1	2	1	2	34
Q3:The CRS enables you to choose what you want to learn.	2	0	1	1	36
Q2:The CRS records your learning progress and performance.	1	0	2	1	36
Q1:The CRS provides the personalized learning support.	0	1	2	3	34
